# Supplementary material for: High-index faceted CuFeS2 nanosheets with enhanced behavior for boosting hydrogen evolution reaction
Source: Royal Society of Chemistry journal article supplement (doi:10.1039/c7nr03182c), 2017-01-01
Supplement: c7nr03182c1.pdf [file c7nr03182c1.pdf]

**Electronic Supplementary Information (ESI)**

**High-Index Faceted CuFeS<sub>2</sub> Nanosheets with Enhanced Behavior for Boosting  
Hydrogen Evolution Reaction**

Yuxuan Li,<sup>+</sup> Yu Wang,<sup>+</sup> Brian Pattengale, Jie Yin, Li An, Fangyi Cheng, Yafei Li,<sup>\*</sup> Jier Huang,<sup>\*</sup> and Pinxian Xi<sup>\*</sup>

Y. Li, J. Yin, L. An, Prof. P. Xi

State Key Laboratory of Applied Organic Chemistry, Key Laboratory of Nonferrous Metal Chemistry and Resources Utilization of Gansu Province, College of Chemistry and Chemical Engineering, Lanzhou University, Lanzhou, 730000, P. R. China

E-mail: xipx@lzu.edu.cn

Y. Wang, Prof. Y. Li

College of Chemistry and Materials Science, Jiangsu Key Laboratory of Biofunctional Materials, Nanjing Normal University, Nanjing, 210046, P. R. China

E-mail: liyafei@njnu.edu.cn

B. Pattengale, Prof. J. Huang

Department of Chemistry, Marquette University, Milwaukee, Wisconsin, 53201, United States

E-mail: jier.huang@marquette.edu

Prof. F. Cheng

Key Laboratory of Advanced Energy Materials Chemistry (Ministry of Education), College of Chemistry, Nankai University, Tianjin, 300071, P. R. China

<sup>+</sup>These two authors contributed equally to this work.

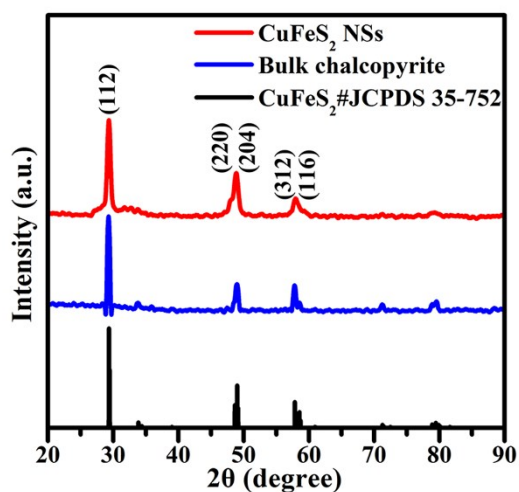

**Figure S1.** XRD patterns of the as-obtained  $\text{CuFeS}_2$  NSs and commercial bulk chalcopyrite.

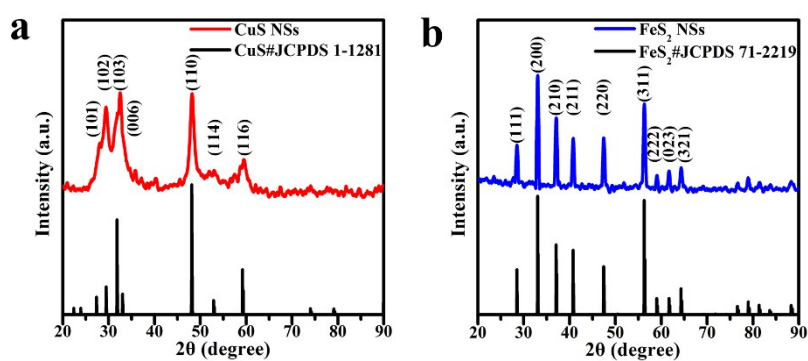

**Figure S2.** XRD patterns of (a)  $\text{CuS}$  NSs and (b)  $\text{FeS}_2$  NSs.

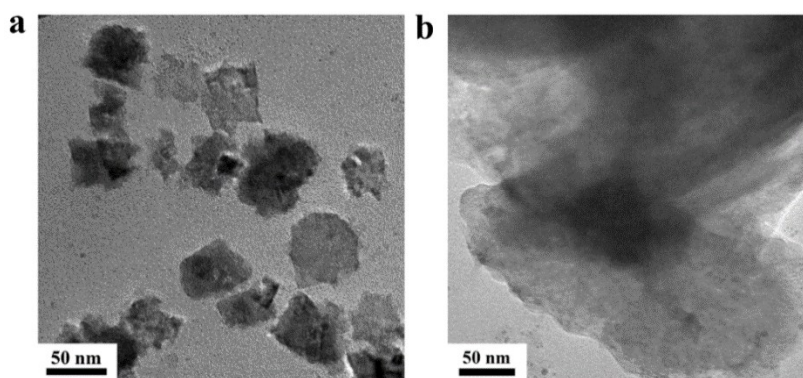

**Figure S3.** TEM images of (a)  $\text{CuS}$  NSs and (b)  $\text{FeS}_2$  NSs.

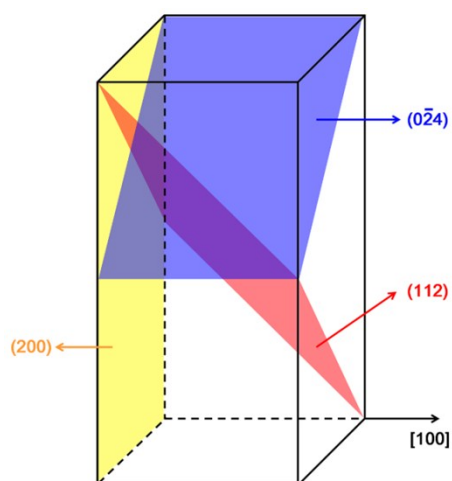

**Figure S4.** Schematic representation of the relative orientation of  $(0\bar{2}4)$ ,  $(112)$  and  $(200)$  facets in tetragonal  $\text{CuFeS}_2$  structure.

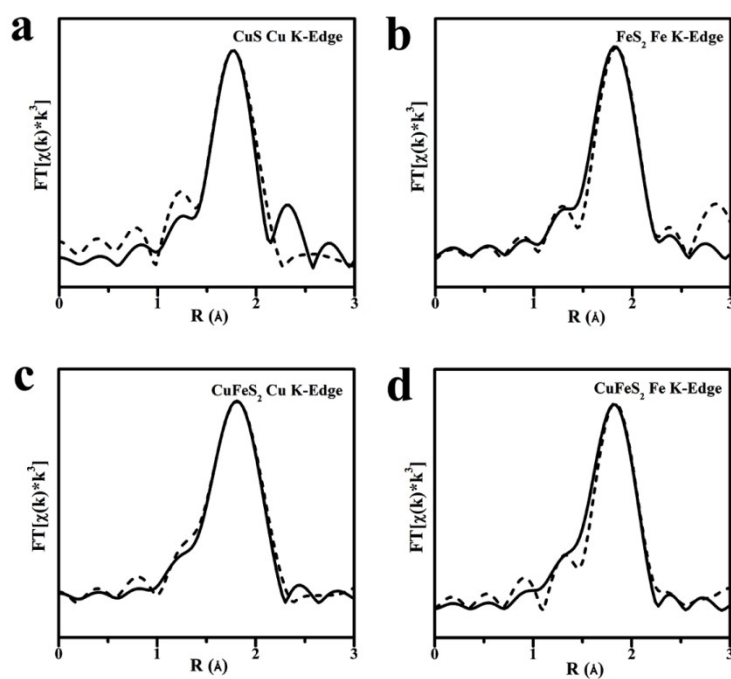

**Figure S5.** EXAFS data (dotted line) and fits (solid line) in R-space for (a) CuS NSs Cu K-Edge, (b)  $\text{FeS}_2$  NSs Fe K-Edge, (c)  $\text{CuFeS}_2$  NSs Cu K-Edge, and (d)  $\text{CuFeS}_2$  NSs Fe K-Edge.

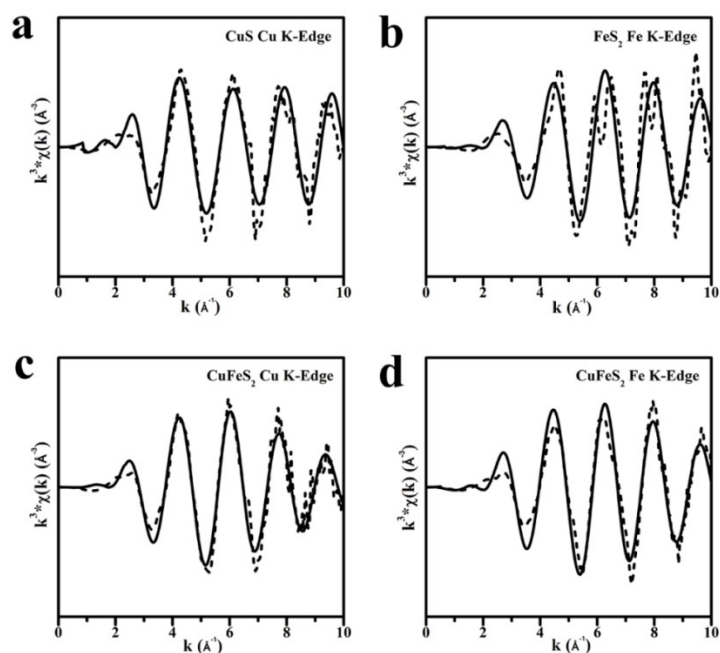

**Figure S6.** EXAFS data (dotted line) and fits (solid line) in K-space for (a) CuS Cu K-Edge, (b) FeS<sub>2</sub> Fe K-Edge, (c) CuFeS<sub>2</sub> Cu K-Edge, and (d) CuFeS<sub>2</sub> Fe K-Edge.

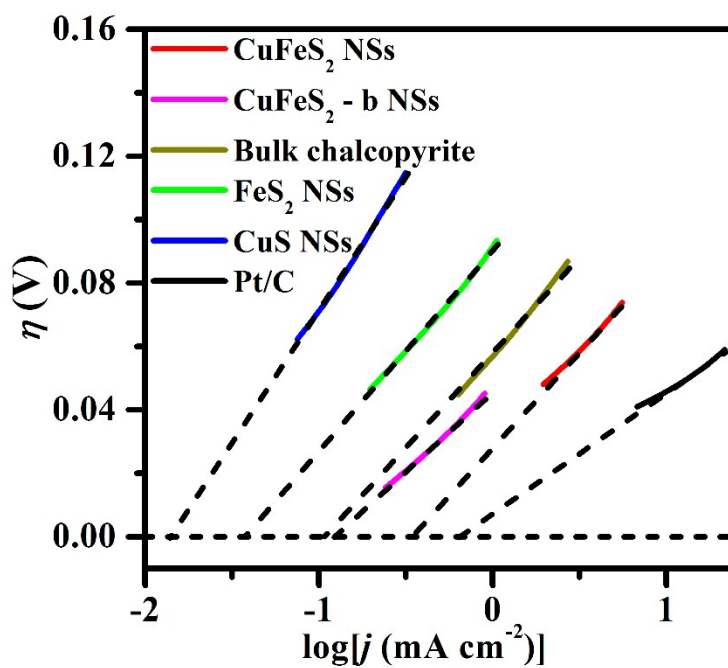

**Figure S7.** The exchange current density for different catalysts in 0.5 M H<sub>2</sub>SO<sub>4</sub>.

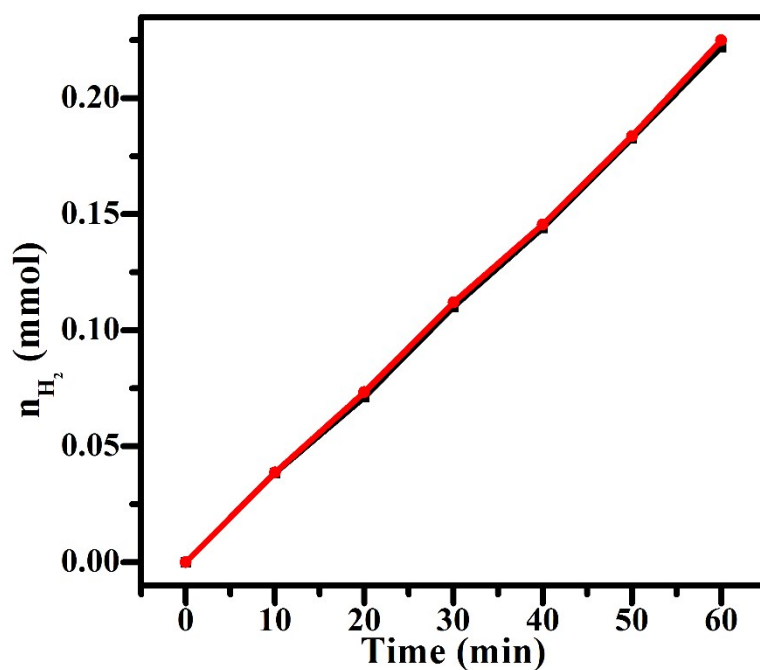

**Figure S8.** The amount of theoretically calculated (red line) and experimentally measured (black line) hydrogen versus time for CuFeS<sub>2</sub> NSs in 0.5 M H<sub>2</sub>SO<sub>4</sub>.

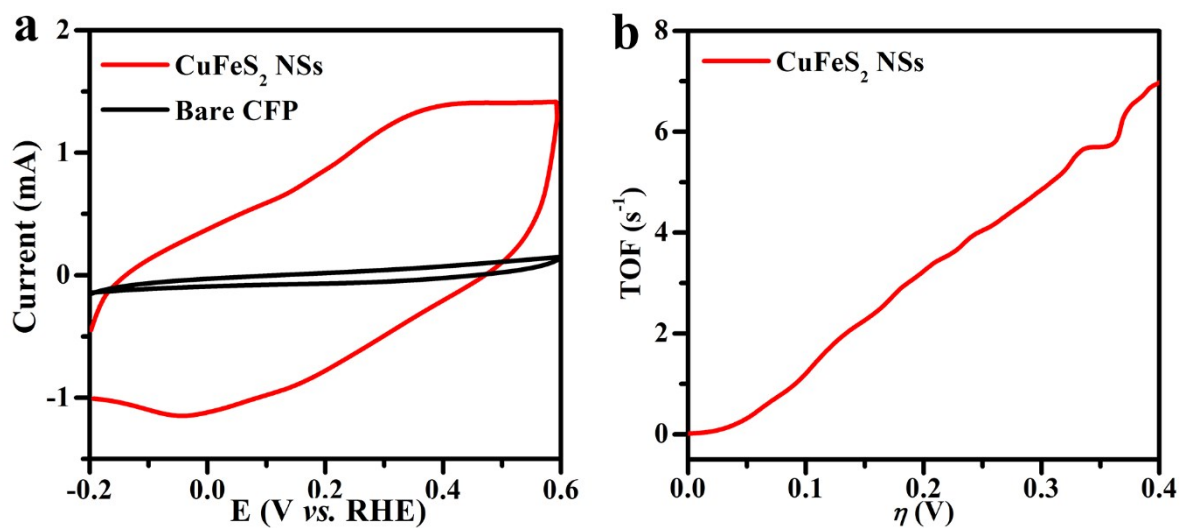

**Figure S9.** (a) CVs of bare CFP and CuFeS<sub>2</sub> NSs in pH = 7 phosphate buffer between -0.2 and 0.6 V vs. RHE with a scan rate of 50 mV s<sup>-1</sup>. (b) Turnover frequencies of CuFeS<sub>2</sub> NSs in 0.5 M H<sub>2</sub>SO<sub>4</sub>.

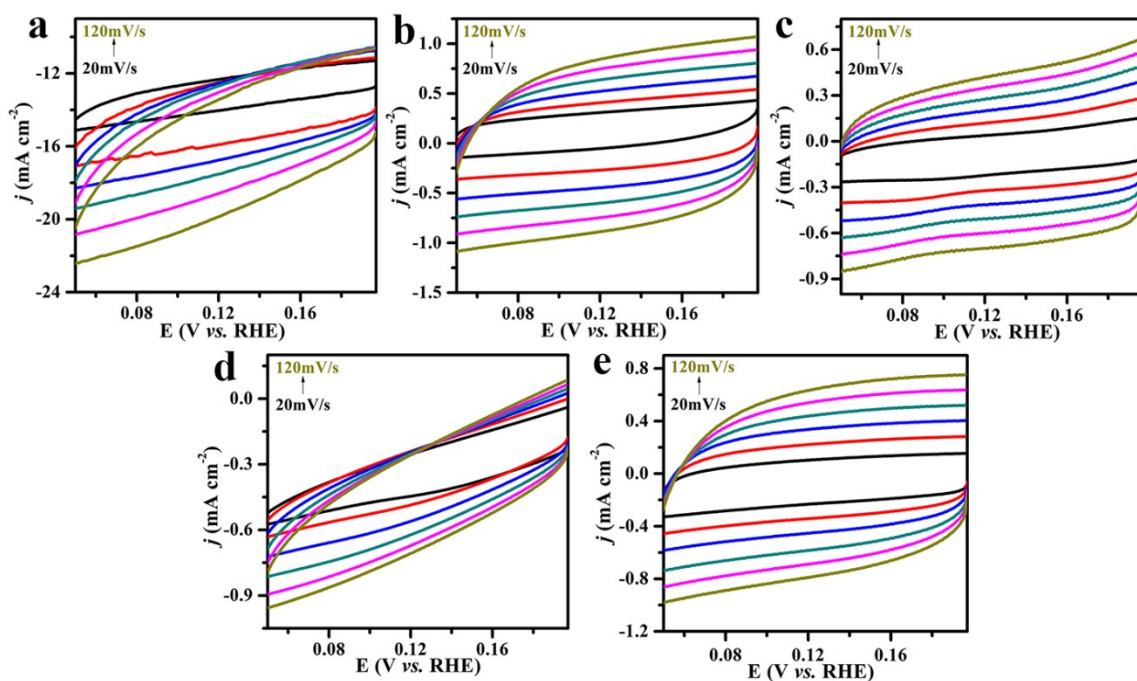

**Figure S10.** Cyclic voltammograms of (a) CuFeS<sub>2</sub> NSs, (b) CuFeS<sub>2</sub> - b NSs, (c) Bulk chalcopyrite (CuFeS<sub>2</sub>), (d) CuS NSs and (e) FeS<sub>2</sub> NSs, with various scan rates in 0.5 M H<sub>2</sub>SO<sub>4</sub>.

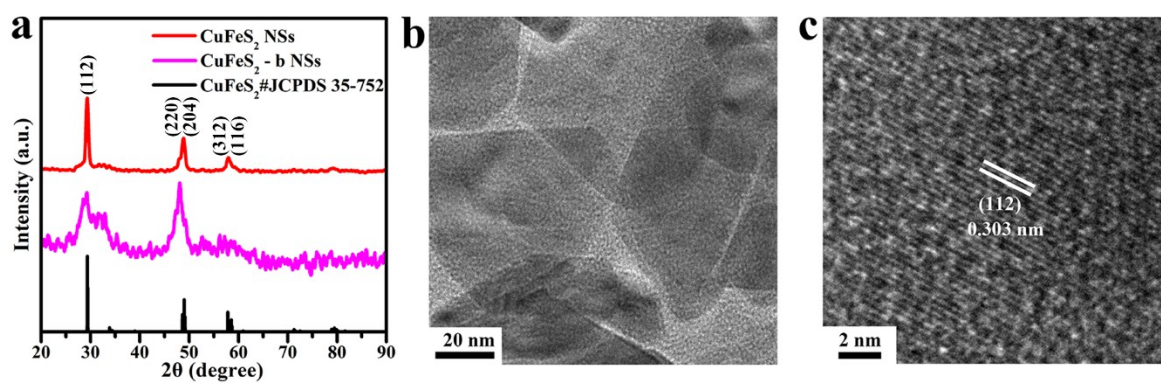

**Figure S11.** (a) The XRD patterns, (b) TEM image and (c) HRTEM image of CuFeS<sub>2</sub> - b NSs.

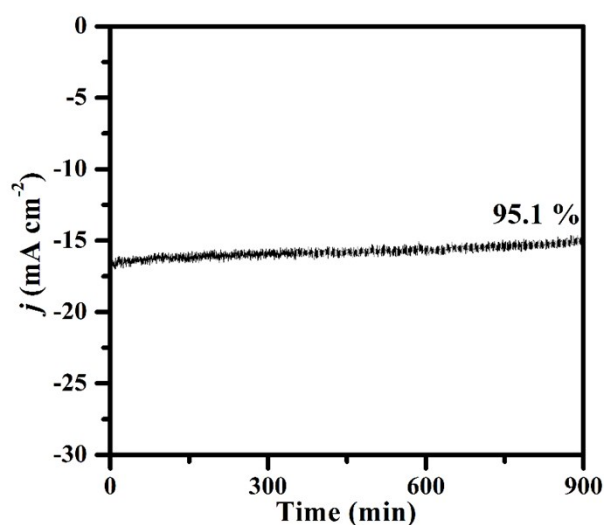

**Figure S12.** Chronoamperometric response curves for HER stability of CuFeS<sub>2</sub> NSs in 0.5 M H<sub>2</sub>SO<sub>4</sub>.

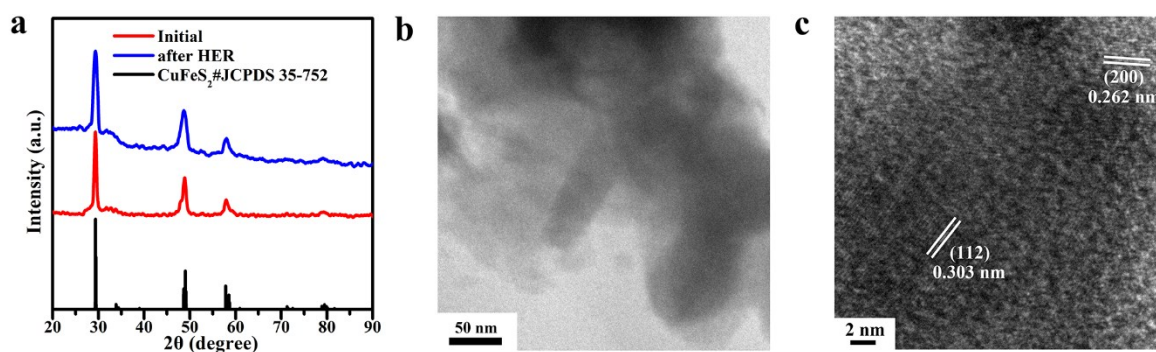

**Figure S13.** (a) The XRD patterns, (b) TEM image and (c) HRTEM image of CuFeS<sub>2</sub> NSs after stability measurement in 0.5 M H<sub>2</sub>SO<sub>4</sub>.

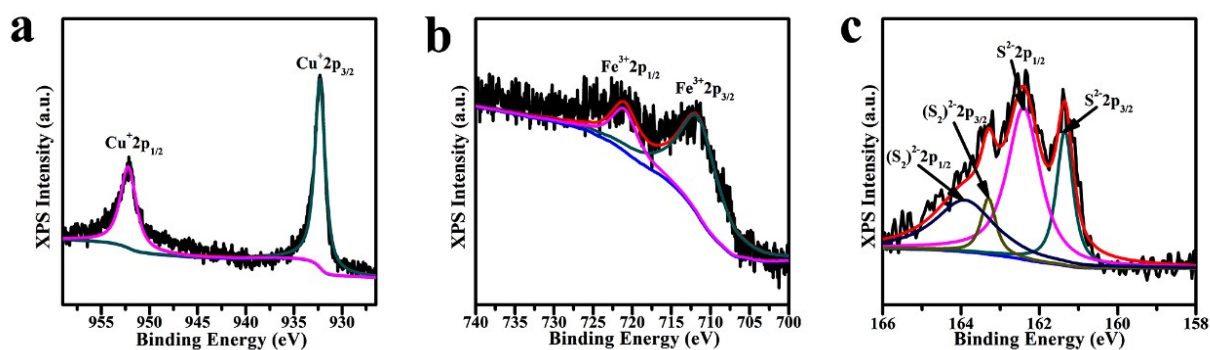

**Figure S14.** XPS spectra of (a) Cu 2p, (b) Fe 2p and (c) S 2p of CuFeS<sub>2</sub> NSs after stability measurement in 0.5 M H<sub>2</sub>SO<sub>4</sub>.

**Table S1. EXAFS Fitting results for Cu-center (top rows) and Fe center (bottom row) for the three catalysts investigated. CNs = Coordination Numbers, R = Vector distance ( $\pm 0.02 \text{ \AA}$ ),  $\sigma^2$  = Debye-Waller factor ( $\pm 0.001 \text{ \AA}^2$ ).**

| Vector                          | CuS NSs |                   |                          | FeS <sub>2</sub> NSs |                   |                          | CuFeS <sub>2</sub> NSs |                   |                          |
|---------------------------------|---------|-------------------|--------------------------|----------------------|-------------------|--------------------------|------------------------|-------------------|--------------------------|
|                                 | CNs     | R( $\text{\AA}$ ) | $\sigma^2(\text{\AA}^2)$ | CNs                  | R( $\text{\AA}$ ) | $\sigma^2(\text{\AA}^2)$ | CNs                    | R( $\text{\AA}$ ) | $\sigma^2(\text{\AA}^2)$ |
| Cu <sub>2</sub> -S <sub>2</sub> | 3       | 2.41              | 0.004                    |                      |                   |                          |                        |                   |                          |
| Cu <sub>1</sub> -S <sub>1</sub> | 3       | 2.25              | 0.004                    | -                    | -                 | -                        | 4                      | 2.28              | 0.01                     |
| Cu <sub>1</sub> -S <sub>2</sub> | 1       | 2.57              | 0.004                    |                      |                   |                          |                        |                   |                          |
| Fe-S                            | -       | -                 | -                        | 6                    | 2.26              | 0.006                    | 4                      | 2.26              | 0.008                    |

**Table S2. EXAFS Fitting results for Cu-center (top rows) and Fe center (bottom row) for the CuFeS<sub>2</sub> NSs before and after HER. CN = Coordination Numbers, R = Vector distance ( $\pm 0.02 \text{ \AA}$ ),  $\sigma^2$  = Debye-Waller factor ( $\pm 0.001 \text{ \AA}^2$ ).**

| Vector | CuFeS <sub>2</sub> NSs before HER |                   |                          | CuFeS <sub>2</sub> NSs after HER |                   |                          |
|--------|-----------------------------------|-------------------|--------------------------|----------------------------------|-------------------|--------------------------|
|        | CNs                               | R( $\text{\AA}$ ) | $\sigma^2(\text{\AA}^2)$ | CNs                              | R( $\text{\AA}$ ) | $\sigma^2(\text{\AA}^2)$ |
| Cu-S   | 4                                 | 2.28              | 0.01                     | 3.7                              | 2.28              | 0.00023                  |
| Fe-S   | 4                                 | 2.26              | 0.008                    | 2.6                              | 2.26              | 0.00016                  |



**Table S3. Summary on the HER performance of reported catalysts by using a graphite rod as the counter electrode in 0.5 M H<sub>2</sub>SO<sub>4</sub>.**

| Catalyst                     | Loading<br>(mg cm <sup>-2</sup> ) | $\eta_{\text{onset}}$<br>(mV vs.<br>RHE) | $\eta_{10}$<br>(mV vs.<br>RHE) | Tafel slope<br>(mV dec <sup>-1</sup> ) | $j_0$       | Reference        |
|------------------------------|-----------------------------------|------------------------------------------|--------------------------------|----------------------------------------|-------------|------------------|
| W <sub>2</sub> C/MWNT        | ~ 0.56                            | ~ 50                                     | 123                            | 45                                     | -           | 1                |
| Mo <sub>2</sub> C@NC         | ~ 0.28                            | 60                                       | 124                            | 60                                     | 0.096       | 2                |
| CoSe <sub>2</sub> NW/CC      | ~ 1.3                             | -                                        | 130                            | 32                                     | -           | 3                |
| Mo <sub>2</sub> C/NCF        | ~ 0.28                            | 85                                       | 144                            | 55                                     | -           | 4                |
| 3DHP- Mo <sub>2</sub> C      | 0.28                              | 35                                       | 97                             | 60                                     | 0.28        | 5                |
| MoSSe                        | ~ 0.28                            | -                                        | 164±2                          | 48±2                                   | -           | 6                |
| 1T MoS <sub>2</sub>          | 0.05                              | -                                        | ~ 200                          | ~ 40                                   | -           | 7                |
| Mo <sub>2</sub> C-NCNT       | ~ 3                               | 72                                       | 147                            | 71                                     | 0.1146      | 8                |
| MoC <sub>x</sub>             | 0.8                               | ~ 25                                     | 142                            | 53                                     | 0.023       | 9                |
| $\alpha$ -Mo <sub>2</sub> C  | 0.102                             | -                                        | 198                            | 56                                     | -           | 10               |
| <b>CuFeS<sub>2</sub> NSs</b> | <b>~ 0.2</b>                      | <b>28.1</b>                              | <b>88.7</b>                    | <b>47</b>                              | <b>0.35</b> | <b>This Work</b> |

**Table S4. Summary on the TOF of reported catalysts.**

| <b>Catalyst</b>                    | <b>TOF<br/>(s<sup>-1</sup>)</b> | <b>Overpotential at the<br/>corresponding TOF (mV)</b> | <b>Reference</b> |
|------------------------------------|---------------------------------|--------------------------------------------------------|------------------|
| Defect-rich MoS <sub>2</sub> NSs   | 0.725                           | 300                                                    | 11               |
| MoS <sub>3</sub> -CV films         | 0.8                             | 220                                                    | 12               |
| CoP/CC                             | 0.725                           | 75                                                     | 13               |
|                                    | 4                               | 240                                                    |                  |
| CoP                                | 0.8                             | 82                                                     | 14               |
|                                    | 4                               | 246                                                    |                  |
| Ni <sub>2</sub> P/Ti               | 0.725                           | 205                                                    | 15               |
| m-Mo <sub>2</sub> C/G(2:1)         | 0.8                             | 128                                                    | 16               |
|                                    | 4                               | 233                                                    |                  |
| MoO <sub>3</sub> -MoS <sub>2</sub> | 4                               | 272                                                    | 17               |
| <b>CuFeS<sub>2</sub> NSs</b>       | <b>0.725</b>                    | <b>75</b>                                              | <b>This work</b> |
|                                    | <b>0.8</b>                      | <b>80</b>                                              |                  |
|                                    | <b>4</b>                        | <b>240</b>                                             |                  |

## References

1. Q. Gong, Y. Wang, Q. Hu, J. Zhou, R. Feng, P. N. Duchesne, P. Zhang, F. Chen, N. Han, Y. Li, C. Jin, Y. Li, S.-T. Lee, *Nat. Commun.* 2016, **7**, 13216-13223.
2. Y. Liu, G. Yu, G.-D. Li, Y. Sun, T. Asefa, W. Chen, X. Zou, *Angew. Chem. Int. Ed.* 2015, **54**, 10752-10757.
3. Q. Liu, J. Shi, J. Hu, A. M. Asiri, Y. Luo, X. Sun, *ACS Appl. Mater. Interfaces* 2015, **7**, 3877-3881.
4. Y. Huang, Q. Gong, X. Song, K. Feng, K. Nie, F. Zhao, Y. Wang, M. Zeng, J. Zhong, Y. Li, *ACS Nano* 2016, **10**, 11337-11343.
5. H. Ang, H. Wang, B. Li, Y. Zong, X. Wang, Q. Yan, *small* 2016, **12**, 2859-2865.
6. Q. Gong, L. Cheng, C. Liu, M. Zhang, Q. Feng, H. Ye, M. Zeng, L. Xie, Z. Liu, Y. Li, *ACS Catal.* 2015, **5**, 2213-2219.
7. D. Voiry, M. Salehi, R. Silva, T. Fujita, M. Chen, T. Asefa, V. B. Shenoy, G. Eda, M. Chhowalla, *Nano Lett.* 2013, **13**, 6222-6227.
8. K. Zhang, Y. Zhao, D. Fu, Y. Chen, *J. Mater. Chem. A* 2015, **3**, 5783-5788.
9. H. Wu, B. Xia, L. Yu, X.-Y. Yu, X. Lou, *Nat. Commun.* 2015, **6**, 6512-6519.
10. L. Ma, L. R. L. Ting, V. Molinari, C. Giordano, B. S. Yeo, *J. Mater. Chem. A*, 2015, **3**, 8361-8368.
11. J. Xie, H. Zhang, S. Li, R. Wang, X. Sun, M. Zhou, J. Zhou, X. Lou, Y. Xie, *Adv. Mater.* 2013, **25**, 5807-5813.
12. D. Merki, S. Fierro, H. Vrubel, X. Hu, *Chem. Sci.* 2011, **2**, 1262-1267.
13. J. Tian, Q. Liu, A. M. Asiri, X. Sun, *J. Am. Chem. Soc.* 2014, **136**, 7587-7590.
14. J. Li, X. Zhou, Z. Xia, Z. Zhang, J. Li, Y. Ma, Y. Qu, *J. Mater. Chem. A* 2015, **3**, 13066-13071.
15. Z. Pu, Q. Liu, C. Tang, A. M. Asiri, X. Sun, *Nanoscale* 2014, **6**, 11031-11034.
16. L. Huo, B. Liu, G. Zhang, J. Zhang, *ACS Appl. Mater. Interfaces* 2016, **8**, 18107-18118.
17. Z. Chen, D. Cummins, B. N. Reinecke, E. Clark, M. K. Sunkara, T. F. Jaramillo, *Nano Lett.* 2011, **11**, 4168-4175.
